# Supplementary material for: Role of the Autism Risk Gene Shank3 in the Development of Atherosclerosis: Insights from Big Data and Mechanistic Analyses
Source: MDPI journal article supplement (doi:10.3390/cells12212546), 2023-10-30
Supplement: s1 [file s1]

**Table S1.** Diagnostic codes for various diseases, treatments, or procedures

| Diseases                                          | Diagnostic, treatment, or procedure codes                                                                                         |
|---------------------------------------------------|-----------------------------------------------------------------------------------------------------------------------------------|
| Autism                                            | 299, 330.8, and F84                                                                                                               |
| Hyperlipidemia                                    | 272, E71.30, E75.21, E75.22, E75.24, E75.3, E75.5, E75.6, E77, E78.0-E78.6, E78.70, E78.79, E78.8-E78.9, E88.1, E88.2, and E88.89 |
| Myocardial infarction                             | 410, I21, and I22                                                                                                                 |
| Ischemic stroke                                   | 433, 434, 436, I63, I65, I66, and I67.89                                                                                          |
| Antiplatelet therapy                              | B01AC                                                                                                                             |
| Computed tomography or magnetic resonance imaging | 33084A, 33084B, 33085A, 33085B, 33067B, 33068B, 33069B, 33070B, 33071B, 33072B, 33098B, and 36021C                                |
| Cardiovascular death                              | 433, 434, 436, 410, 414.00, 414.01, 414.02, 414.03, 414.04, 414.05, I21, I22, and I25                                             |

The codes corresponded to those specified in the *International Classification of Diseases, Ninth Revision, Clinical Modification*; *International Classification of Diseases, Tenth Revision, Clinical Modification*; or Anatomical Therapeutic Chemical classification.
